# Supplementary material for: Splice Variants of the Castor WRI1 Gene Upregulate Fatty Acid and Oil Biosynthesis When Expressed in Tobacco Leaves
Source: MDPI journal article supplement (doi:10.3390/ijms19010146), 2018-01-05
Supplement: s1 [file s1]

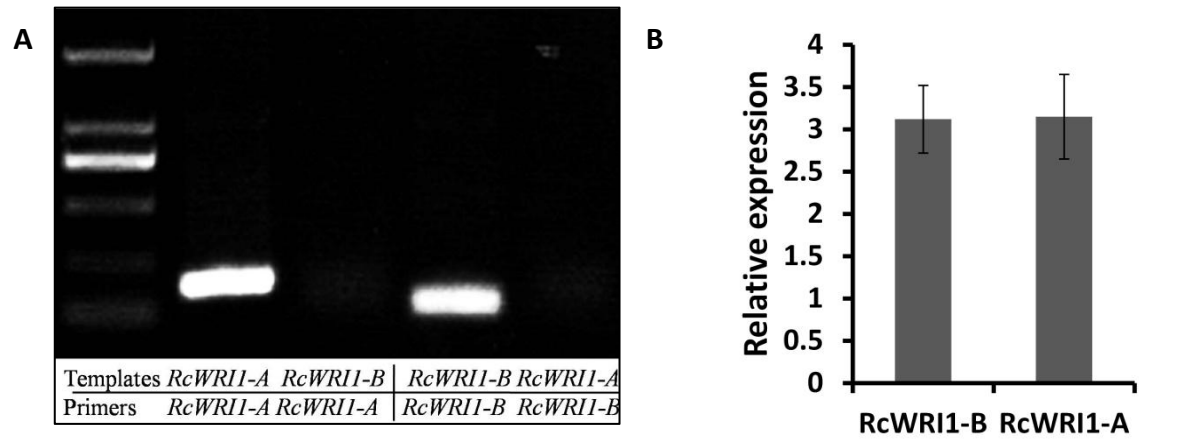

Figure S3. A. Verification of the primer specificity of two *RcWRI1* isoforms. Plasmids of were used as templates in PCR analysis. Specific PCR products were analyzed on 1% agarose gels. B.The relative expression of *RcWRI1-A* and *RcWRI1-B* in tobacco leaves either expressing *RcWRI1-A* or *RcWRI1-B*. Total RNAs were isolated from the leaves and used for qRT-PCR analysis. Each value is the mean  $\pm$  SD of six biological replicates.
