# Supplementary material for: Splice Variants of the Castor WRI1 Gene Upregulate Fatty Acid and Oil Biosynthesis When Expressed in Tobacco Leaves
Source: MDPI journal article supplement (doi:10.3390/ijms19010146), 2018-01-05
Supplement: s1 [file s1]

>NW\_002994462.1

```
1   GCATAAACAA TGAATATTTA ATATATATTT AATAAACATA TATTATTGAA TATTTAGTAT
61  AAATTTAATA AAATATAATT TTTTTTTTAA AAAAAATTCA TATAAAGATC AGACGCATAT
121 CACATCACGT GCACATCAAT ATTTGACCCA CGTATATACA TGGATTAGAG CATATAGCTT
181 CATTCAACAG GTTCCAAC TAATCTCCCGC CATGGTATGC TACCGCTGCC TAAACGACAA
241 CTCGTTTATG TCGCAATTTG TAAAGCTGTC TGATGAGCAA CCAAATATAA ATGCAAAAGA
301 AAAAAAAGG AAAAAAGAAA ACAAAGAGGA GGTTTAAGTC ATTATGTGTA TAGATTGTAG
361 AACTCCTTAA AAATAACTCA GAAATGTCCT TACACGTCCC TTAGTTTTCA AGTGAAACAC
421 AGACACAGAG CCAGAAAAAC ACAAAGTAAC TGACATATCA GTGATATAAA AAATAAAACT
481 TAAAAGAAAG AAGGGATTAA GAAATTAAAA AGTCATTTAT TTAAAATAAT AGTGAGATTC
541 TGTCAAAC TAACCAAGGC CAGCAAGCAT AGGGCTAAAA ACACCCGATT GGTAGCATGG
601 CTGCAGCTTA AGCCAAGTGT TGGGCATTAA TTTAACTCAT GGTTAACTAT TAACCCTAAC
661 TCTTCTTAAC TGCTGTTTGC CCCCATGGTT AAACACAAC AACATGTTTT GCACTCATTT
721 TGGGCAGGGT TTTTCCTTCT TCTTTTTTTT TGGGTAAATT AAAAATAATA ATAAATACCT
781 TTCGCTTCTG CTTCTCCCCA TTGTCTCTCC ACTTCTTGTT TTGGTAAACC ACTTCTGGTT
841 ACCAAAAAAA ACCCACCTCT CTTACATTCT TCAAAGTCGC AAAATCTTTA CCAAAGAGA
901 GAGAGAGAGA GACCTAACTT AAAAAAATCA TACTCTTCTT GAGTACTGCA TTTAAGTTTC
961 TTTTGTTTTG TTTCTCTCAT TAAAACAAGA AGAAGAAGTT AAGAAGAAGA AGTAAATGAA
1021 GAGGTCTCCT ACTTCCCCGT GCTCTTCTTC TTCATCATCT TCATATTCAT CTTCTTCAGC
1081 TTCATCTTCT TGTGTCGGTC CTGATGATAC TCCTGTCGCT CCTGGTAGTC ATCATCATCA
1141 TGATCACCAC CAATTACGAT CGCAGAAATC ATCCAAACGC ATTAGAAAAG TTAACAAAAA
1201 GCAGCAGAAC CATAATATTG ATCAGAATAA TACTAACACC ACTATTACTG CTCCTACCTC
1261 TGCCAGAAGA AGCTCCATTT ACAGAGGAGT CACCCGGTAC TTGCTACTAT TATATATTTA
1321 TATATATATA TATATATATA TATTCTAATA CCAATTGGCT AATTGCTGGG ACTAATTGAC
1381 TAATATTTCC TATAATGTAT ATTTTGTTTT CTGGCTTTTC ATTATTATTA TTATAAAAT
1441 TTTGTGTTGA TGAAAACAGG CATAGATGGA CGGGAAGGTT TGAGGCACAC CTTTGGGATA
1501 AGAGTTCATG GAATAACATT CAAAACAAGA AGGGAAGACA AGGTGATTTT CCCTTAATTA
1561 ATTAATAATT ATTTTATAAT GATTATTATT TTGTTTTTAC AAAAATCAAG GAGATCTGTA
1621 ATATTAATTA TTTAATAAAT TATTTTACTT TTTTAGAGAC TTTTCTTTCA TATTTGTTTT
1681 TCTTAATGTT TTCTAATAAC TTATTGTTAT GTTCTGACTA CGTTTTATTC CTGATTATCC
1741 CTGTCACTGT AACGTTTCATG TACACTTTTG TCGCTGCTTA GTTTATTTGGGTAAGCACTT
1801 ATGACCTCAA ACCAATATTT TAATCACTTT CATTTTATTT TTTAGTAATA AATGATTATT
1861 CTTTTTTTATT TTCTAATTGA AAAAATAAAA TTGCAGGGGC CTATGATAAT GAAGAAGCAG
1921 CTGCTCATAC TTATGACCTT GCTGCCCTTA AGTACTGGGG ACCAGAGACA ACCTTGAATT
1981 TCCCCGTATG ATAACTTTT TTTTATATT AATTGTCAAT ATTTAAAAAG CAAAAACGTA
2041 CTCAATTGGG GTGAATTGGG TGTGTAGAT AGAAACATAT CCTAAAGAGC TTGAAGAGAT
2101 GCAAAGATG AGCAAGGAAG AGTACTTGGC ATCTCTTCGA CGCCAAAGCA GTGGGTTTTT
2161 CAGAGGAGTT TCTAAGTACC GTGGGGTTGC TAGGTAATTT CTCTTTTTTC TTTTTTGTTT
2221 TTCGAGAAGG ACAAAGAAAT AAATAAACTC GAACATAAGA TTTTATTCAA TTTTCTTTGA
2281 ACATTCGAGC TTGAAATTTT CTTACTTAAT TTCAAATATA CACTGCTGTC AGGCTAAGTC
2341 CGTTGATGCA TTAATAAAAT AATATTAAAT TTGCCTTTAA TTAAATTTGT TTTATTGGTT
2401 TGAAATTCTG TAACAGGCAT CACCACAATG GTCGATGGGA GGCACGAATC GGACGAGTTT
2461 TTGGCAACAA GTATCTCTAC CTTGGCACTT ATAGTACGCT AATCTCTCCT TTCTACAAAT
2521 AATCTTCTTT TATTAGAACG TCAAATGCT ACTAATCTAA TTATGGAATA AAAGAAGTGG
```

2581 GCTGTGCAAC CTGAATATAT AGGAATGAGC AATGCCTAAT TAGGAAATAA TCAATGATAT  
2641 CATCATCATA GTAAACTTGG CCCCCGCCTC AATTAATTAG AACTAGAAAT GCTTACCTAC  
2701 CTTAATTCAT CTCATTTAAC ACATTTATTT GACCCGTAAT TTTTAATTAT ACCAAAAATA  
2761 TATTAAATAT AGATTCTTAA TAAATAGATG AATGATATAT TTACATTATT ATTCTATATT  
2821 ACTATATTTA ATATTAAATA ATTAATATAA TTAATTATTT AAAATCAAGA AATATGTGTA  
2881 AAATTTTAAC GGACTCTAAA TATTAAATGT GTTTTTATCT AGATATTAAA ACTTATAAAT  
2941 AAGTGATATA TATTTTTTAAT TTTAAGTAAC GTATTTATAT TTATGTGTCA TTTGTTTATT  
3001 CTTTATGGGA TATATATGTG GTCTGAGGTA TATTTACTCA TCCATTGATT CAATGGTAAT  
3061 TTACTGATTC AGTGTATCAC TGTGTATTTT ACGCATGAAG TGTGTGTTCA CACATGCCTC  
3121 TTTCTAAATC TCGACAAAAT CAAAATTAGC AGACTCTGTC CAAATGGAAT AAGTAAACCA  
3181 TCACTGTTGG TTCTTCTTTT TTTTTTTTTT TTTTTTTTTT TTTTGGTCGA GAAACTTTTC  
3241 AAAAAGGTGC ATTTCTTTTG CAATCGGAGT TTTGTGAATT TCTACAAGAG AAGAATATGG  
3301 CCAACTTTTT ACCTGACTG GATGCTAAAA TTCAAAGTTG TAGGTGTCAG TCAACCCACC  
3361 TAACGTGGCA GCCCCGTTTT CTTTAAATAT GTTCACATTT ATATCCTCTA ACTCAAGATG  
3421 CTTTTTATTT TATTTTAATT GTTTTTGTTT TATTTACTGT AGCTTTCAA AATTGTTAAAT  
3481 ATTACATAAG TAGTTTGTGT TCGGGTGTCA ACATAAAATA GTCCATCAAT TTGTTTTTTG  
3541 TCTCAGCTTC ACTACCTAAT TAGCTATATA AAATGAAATT AATAGATGAA CTGAAATAAA  
3601 TAAATAACAT ATATATATAA TATTTTTTTT AAAATTTAAG TGATTAAATA GATGTTATTC  
3661 ATTATTTTTG GTGCACAGAT AGAACCGATA TTTAAACTAA TCAAACAATT TCTTTATCTT  
3721 CTTCACATTT TTTTTGAGAA TTATCAAAG TAGATTTAGA TTAAATCTAA AGTCTCCAAC  
3781 TACAATCCCA AATTAGAGAT TTTTTTTTTT CAAAACAAAG CTGAATAGTA CTGTGAAAAG  
3841 GGTAGCAAAG TAGGCAAGTA ATAGCAGTCT ATTTGGTAAT GACAGTTTTT GTAATAAAAA  
3901 CAAGAGAGAT GGGTTGTGAG TACACCTGGA TGTGTGCATG AACTGCTACT TGATATATAG  
3961 TGCCTGGATT GCGCCAGGTC TACAAAAGCA AATTTCTCTT TTCTCCTTTT TATTTTATTT  
4021 ATTTATTTAT TTTTTCTCTC TATTCTATTA CTTGTTTGTT GGTCAGATCC CAGTAACAGA  
4081 TTTGGCCTCA CTTTTCTCTG TAATCACTAA TTAGTATTCA GTGTGGAAGT CACGTGACGC  
4141 CTCTTTTACT AAGACAATAA AAGAAAAGCT CACGTTCTTC TCAACAACAA GAACAGAAAT  
4201 AAAAGCTTTT TCTCACATTT GCCAAAAGCC CCAAATCTCA GATCTTACAC TTTCCCTTC  
4261 ATATATTTTT TATCAACACT GTCATATTAT GTTTGTACGA TCCTTTTTTC TTTATTTTTT  
4321 TTAAGAAAAA AAAGTTACAA ACATTTTCTT TTTCCACAAT AGTTTATTTA GGGGTTACAT  
4381 ACTTTCCAAA TACAAATATA TTTTAAAG ATAATAATAG TTTCATTTTA GTCATAAAAT  
4441 TTTAATTTAT ATCATCCAAT TTTAATCTTA TTTCAATTTA GTTATTTTGT AAATAAAAAA  
4501 TTGACACAGA CAAGAATAAC TAACAAGAAA AGAGTAATTG AGGAAGAAAA ATATGACATG  
4561 TCAATTTTTT ATTGGCAAAG TGAATAAATT GCAACTAAAA CTAAAGTTAA ATGATTAAAA  
4621 TGTAACAAAT AAAAATTTTG TAACCAAAT GAACTAAGT GCAAAGTTAA GTGACAATTA  
4681 ACTATATTTT TATTAGAAAG ATCTTGTTTA CACGGGATGT TTATTTTCAC ATATATACCA  
4741 AATTTGATAA ATAAAAATAC ATTTAATTTT AAGTATATGT ATCGAAGTGT AAAAATTTA  
4801 TATATATATA CACACACAAC TCGTAAATTT CATTTATTCA TTACTCATTG TAATTACCCT  
4861 ATTTGTTAAG AGATATTTTT TTGGTTTTAT CATGGTGTGT TGGTCATTTT GACCAAACA  
4921 CTATTTTTAT GGATTTTGGG AGCAGTTGTA TATTTTTACC ACATTCAGCC TCTACTTAGT  
4981 AAACAAAATG TTATCTAATT TTACTAGGGA AGAACTGTGA GAACTAATT GGTGGACTG  
5041 GGTTGTTAAT AATTTTATAT TCTACCATAA AGAGACTTAA AGCACTCATT ATTAGCCACA  
5101 TAGAGTATAT ATTTTGATCT ATTAAGCTGC ACTGCGGAGG CTACTTTTTT AATATTAAT  
5161 TCTAAAAAAA ATTAATTTTA GTTAATCAAG ATTTATATTT CTAAATGTT ATTCAGACAC

5221 ACAAGAGGAG GCAGCAGCAG CATATGATAT GGCAGCAATT GAGTACAGAG GAGCAAATGC  
5281 TGTGACCAAT TTTGATATCA GCAATTACAT AGACCGCTTG AAGAAGAAAG GCATCCTTTT  
5341 AGACCAGATA CTCCCTGATC AACCACTTAG AAAATGCTCT AGCGAATCTG AAGAAGCAGA  
5401 AGCAGAAGCA GAAGTTGAAC GACTGCCGTC ACTGCCCTCA TCGATATTAC CACAAGAACA  
5461 GGACACAATC TCACCACAAC TTCAATGCAC ACAGCTCCTT CCATCCATGG ACTCTTGCAC  
5521 AATGATTAAT ATGGACCCTA TCGAAGATAA TGAGCTCACC TGGAGTTTTT GCTTGGATTC  
5581 TGGGCTGACC CTTTTCTCAG TACCCGAGCT CCCCTCGAA AATGCTTGCG AGCTACCGGA  
5641 CTTGTTTCGAT GACACAGGCT TTGAAGACAA TATAGACTTG ATATTTGATG GGTGTTGCTT  
5701 TGGAAATGAT GATGACGGTG GTGGTGGTGC CAACCACCAG GAATTTATGG TGGAAAGTAG  
5761 AGGATGTAGG GTAGGGGAGG TTGGGATTTT AGGGAGCATG GAGGAGGAAA ACGGGAAGGA  
5821 GATGTGTTGC AGTTCAAGTT CGCCATCTTG TTCAACAACC ACCTCGGTTT CTTGTTGTAA  
5881 **CTATTCTGTT** **TGA**ATTGCCG TTTTCTTTGG TTCTGGTTTT AGCTTTGGTC GAGGTTTGTT  
5941 TGTTTGTTTG TGGGTAGATA TAATATCACA TGGGAAATCA GAGGATGGGG AAAATGTACT  
6001 TTTTTTCGAA AGTAATTGGT GTGTTGATCG CCCGATATG CATATCCGGA ACCTCATCTA  
6061 TTTCCAATAA CAAAGTTATT ATAGTTGATA GAATAAATAA AACTTCTAGG CTCCTTTTAA  
6121 ATTTTTTGAA AGATTGGTGT TTCCCTATA GTTATAACAT ATATTGCAAA AGTGCATTAG  
6181 ACATATTTCT GTTAATCTAA AGTTTTAAAT AAAATCTAAT TAAATGTGTA AAGATTTTTA  
6241 AAATAGTATT TTGTCGCTTG TAAAGTTTTG TCTGTCATGC TCTATATTAA TTTCGAACCG  
6301 AACATATAAA CATTAATAAA ATATAATTAA ATGCGTTAAA AAATTATAAT TAAGATAAAT  
6361 TACATAAAAC TTTACAATTT ATATTAAAAA AATCATTTTC TTATTATATT TTTTATTAC  
6421 AAATAAATT GTTATTAAAT TTTAATTTTA ATAACACACC AATAATTTT TTACAGCTAA  
6481 TGTGTAGGTT TGAATGAATA ATATTAGATT TTGCATTTTG TAATAAAAAA GATATCAATT  
6541 TTTATTATTT TTATAACTAA ATCATTATTA AATTTTAATT TTAATAACAC CAATTGTTCT  
6601 ATAGCAAATG AGATACATAA TCCTTATTAT GCACTTTAAA ATTAATTTAC TCTCTTCTCT  
6661 CTTCTTCTTA GACAAAGTTA CAAATTCTTT CCTACAAATA TGGTAAAATT AAATAAATAG  
6721 AAAAAGAAGA GAGTATATTA GTTTTAGGAT TTTAGGCTAA TTCTTATGTA TCCAATTGCT  
6781 TACTAAATTT AATGATACAA GTTATTTCTT CCATGTGTCA ATGATGATGT GGGGTTAGAG  
6841 AATGAATAGT TTTTAAATAT TTATTTTCAA ATGGTACATC ATCCAAGTAT ATCAAAAAAA  
6901 TTCACTGGTA TTATTAAAAAT TAAA

Figure S1. RcWRI1 genomic sequence. The exons labeled in red, and the intron is indicated in blue. The intron boundary signals (AG and GT) are indicated in bold blue letters.
