# Supplementary material for: Splice Variants of the Castor WRI1 Gene Upregulate Fatty Acid and Oil Biosynthesis When Expressed in Tobacco Leaves
Source: MDPI journal article supplement (doi:10.3390/ijms19010146), 2018-01-05
Supplement: s1 [file s1]

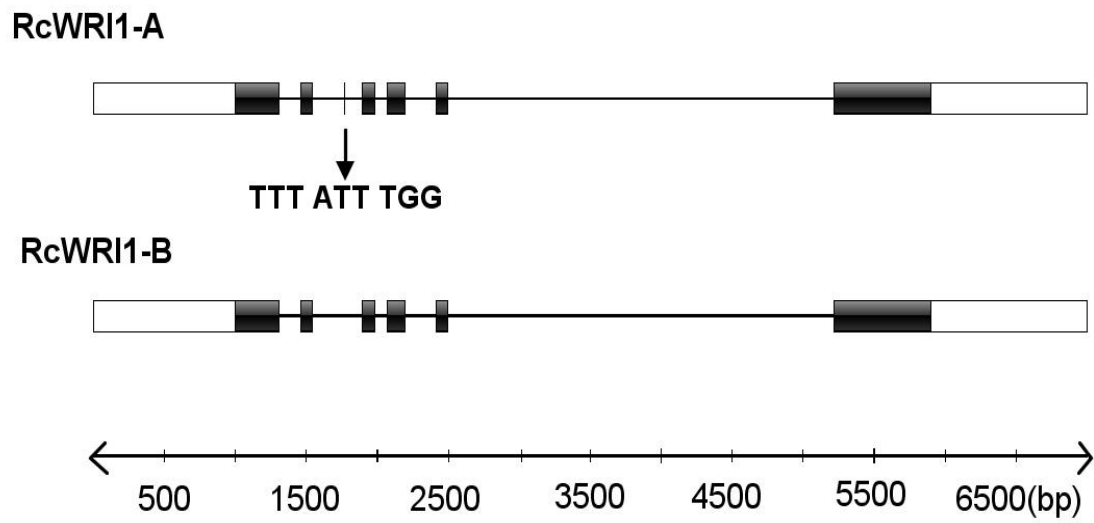

Figure S2. The gene structure of splice forms RcWRI1-A and RcWRI1-B. The splice form A (RcWRI1-A) contains 9-bp (TTTATTGG) exon encoding “VYL”, which is absent in the splice form B (RcWRI1-B).
